# Supplementary material
Source: publisher figshare collection journal article supplement (https://acs.figshare.com/ndownloader/files/4192027)
Supplement: Supplementary file 1 [file 4192027]

# Agouti-Related Protein Segments Outside of the Receptor Binding Core are Required for Enhanced Short and Long Term Feeding Stimulation

Michael E. Madonna<sup>1</sup>, Jennifer Schurdak<sup>2</sup>, Ying-kui Yang<sup>3</sup>, Stephen Benoit<sup>2</sup> and Glenn L. Millhauser<sup>1\*</sup>

<sup>1</sup>Department of Chemistry and Biochemistry

University of California, Santa Cruz, CA 95064

<sup>2</sup>Department of Psychiatry

University of Cincinnati, Cincinnati, OH 45237

<sup>3</sup> Department of Surgery

University of Alabama at Birmingham, Birmingham, AL 35205

\*Address Correspondence to: G. L. Millhauser

voice: (831) 459-2176; fax: (831) 459-2935

email: glennm@ucsc.edu

## SUPPORTING INFORMATION

### Peptide Characterization Data

| Peptide      | Reduced                 |                                      | Oxidized   |                                      |
|--------------|-------------------------|--------------------------------------|------------|--------------------------------------|
|              | Mass (amu) <sup>a</sup> | C <sub>18</sub> Retention Time (min) | Mass (amu) | C <sub>18</sub> Retention Time (min) |
| AgRP(83-132) | 5686                    | 36.4                                 | 5676       | 35.2                                 |
| AgRP-2Q      | 5658                    | 35.1                                 | 5648       | 31.6                                 |
| AgRP-4Q      | 5602                    | 33.9                                 | 5592       | 27.3                                 |
| AgRP-2K      | 5815                    | 32.8                                 | 5805       | 30.5                                 |
| AgRP-4K      | 5897                    | 32.1                                 | 5887       | 29.8                                 |

<sup>a</sup>All masses are consistent, to within 1.0 amu, of that expected based on the respective sequence.
